# Supplementary material for: A Comparison of the Quality of Informed Consent for Clinical Trials of an Experimental Hookworm Vaccine Conducted in Developed and Developing Countries
Source: PubMed Central journal article supplement (PMC5289607; doi:10.1371/journal.pntd.0005327), 2017-01-23
Supplement: pntd.0005327.s003.pdf [file pntd.0005327.s003.pdf]

1 **INFORMED CONSENT FORM FOR A NEW RESEARCH PROJECT – STUDY PART II**  
2

3 **Title of Research Project:** Phase 1 Study of the Safety and Immunogenicity of Na-GST-  
4 1/Alhydrogel<sup>®</sup> with or without GLA-AF in Brazilian Adults

5 **INTRODUCTION**

6 We are asking you to participate in a research study for a new hookworm vaccine. This consent form  
7 gives you information about the study that will be discussed with you. Once you understand the  
8 study, and if you agree to join, we will ask you to sign or put your fingerprint on this form. Two  
9 copies of this document will be signed. We will give you one copy to keep and the other one will be  
10 stored by the investigator, so that there will be two signed copies.

11 First, we want you to know that:

- 12
- 13 • Your participation in this research study is optional.
  - 14 • You do not have to take part in this study, or you can decide later to leave this study if you change  
15 your mind.
  - 16 • If you decide to leave the study, nothing that you have received will be taken away from you.
- 17

18 Before you decide to be in this research study, please take as much time as you need to ask any  
19 questions and discuss this study with people on the research team, or with family, friends, or people  
20 from your community. You may also ask questions at any time after joining the study.  
21

22 **WHO IS SPONSORING THIS STUDY?**

23 This research study is being done by Centro de Pesquisas René Rachou FIOCRUZ in Belo Horizonte,  
24 and is being funded by the Sabin Vaccine Institute, located in the United States. The people  
25 responsible for the study are Dr. David Diemert, a physician at the Sabin Vaccine Institute in the  
26 United States and at FIOCRUZ in Belo Horizonte, and Drs. Vanderson Valente, Janaina Freire,  
27 Frederico Talles, and Geraldo Castro, all from FIOCRUZ.  
28

29 **WHAT IS A HOOKWORM VACCINE?**

30 Scientists at FIOCRUZ and the Sabin Vaccine Institute are doing research to make a vaccine against  
31 hookworm. This new vaccine against hookworm is a protein – Na-GST-1 – that comes from a small  
32 part of the hookworm parasite. This vaccine is being tested and is not yet approved for use in Brazil,  
33 the United States, or anywhere else. At this time, there is no other vaccine for hookworm. We hope  
34 that this study will give us information that can be used to develop a hookworm vaccine that will help  
35 stop people from getting sick from this worm.  
36

37 **WHY ARE WE ASKING YOU TO TAKE PART IN THIS STUDY?**

38 We are asking you to be in this study because you live in an area of Brazil where many people get  
39 worms. Hookworm is one of many types of worms that are found in the area that you live. Anyone  
40 can get hookworm if their skin touches dirt or water that is contaminated with hookworm larvae.  
41 Larvae in the dirt or water come from the feces of people who are already infected with hookworm.  
42 Sometimes you can feel sick from the worms and other times you may not know that you have them.  
43 When you have hookworms you may feel tired and weak.  
44

45 We are asking you to be in this study because the researchers want to test a new vaccine against  
46 hookworm to see if the vaccine is safe, before testing it in more people or in children. Only adults  
47 between the ages of 18 and 45 years can be in this study. The vaccine we will test in this study is only  
48 against hookworm and it will not have any effect on other kinds of worms.  
49

50 **WHY ARE WE DOING THIS STUDY?**

51 In this study, we want to find out:

- 52 • If the new hookworm vaccine is safe when given to adults
  - 53 • How your body reacts to the vaccine
- 54

1 If the vaccine is safe when given to you and the other participants in this study, the researchers will  
2 test it in children who live in the northeast region of Minas Gerais.

#### 3 4 **HOW LONG WILL THIS STUDY LAST?**

5 Your participation in this study will last for 16 months. If you think that you are going to move away  
6 during this time, you will not be able to join this study because you need to be here for the whole  
7 study.

#### 8 9 **WHAT DO I HAVE TO DO IN THIS STUDY?**

10 If you agree to be in this study, the first visit will be a screening visit. We will ask you some  
11 questions about your health. We will also ask you to answer a questionnaire about your  
12 understanding of the study and your reasons for participating. You do not have to answer this  
13 questionnaire if you do not want to and you can still participate in the study if you don't answer the  
14 questionnaire.

15  
16 One of the research medical doctors will examine you to see if you are in good health. A small  
17 amount of blood (around 30 mL) will be taken from your arm to do some lab tests. Your blood will  
18 be tested to check the function of your blood, your liver and your kidney, and to see if you are  
19 infected with viral hepatitis or HIV. You will give us a stool sample so we can check if you have a  
20 worm infection. The medical doctor will have to wait for your test results to come back from the lab  
21 before we will know if you can be in the study. If you are a woman, we will ask you to give us some  
22 of your urine to see if you are pregnant. Pregnant women and women who are breastfeeding cannot  
23 be in this study.

24  
25 If your blood tests show that you have an illness, or if you are not in good health, you will not be able  
26 to be in this study. The researchers will discuss this with you and will make sure that you are  
27 followed up at the health post in your community. If you are infected with worms, you can still be in  
28 the study, but only if you agree to be treated with medication for the infection before you get any  
29 injections.

30  
31 If the screening tests and the medical exam show that you can take part in this study and if you still  
32 want to be in the study, we will ask you to come to the study clinic to start the study. It is possible  
33 that we will not choose you to be in the study even though we ask you to come to the clinic. If this  
34 happens, we will ask you if you want to receive the hepatitis B vaccine instead of being in the study.  
35 If you are chosen to be in the study, you will receive a total of three injections of the new hookworm  
36 vaccine over a period of 4 months in one of three different doses of the vaccine: low, medium, or  
37 high, or the hepatitis B vaccine (the same one that is given by the government of Brazil). We are  
38 trying to find the dose that is the safest and that gives the best chance of preventing hookworm  
39 disease. In addition, we are trying to see IF a new immunostimulant called GLA-AF can increase the  
40 strength of the vaccine.

41  
42 The injections will be given in your upper arm muscle using a needle. If you are a woman, your urine  
43 will be tested before every injection to make sure you are not pregnant. If you are pregnant, you will  
44 not be allowed to receive any other injections, but we still will still follow you at the study clinic –  
45 without any cost to you – so that we can check if you and your baby stay healthy. We will follow you  
46 at least until the end of your pregnancy, during delivery, and if necessary, after delivery for as long a  
47 period as is necessary.

48  
49 In this part of the study in the region of Americaninhas, 30 people in the study will get the new  
50 hookworm vaccine, 30 people will get the new hookworm vaccine mixed with the immunostimulant  
51 GLA-AF, and 6 will get the hepatitis B vaccine. You, the doctors and other members of the study  
52 team will not know which vaccine you get. The decision will be made by chance, like when you toss  
53 a coin and you don't know what side it will land on. Everyone will get three injections. The second  
54 injection will be given 2 months after the first injection, and the last shot will be given 2 months after  
55 the second. You will get the same vaccine for each of the three shots. At the end of the study, we  
56 will tell you which vaccine you got. The hepatitis B vaccine will protect you against hepatitis B

1 infection, but it will not stop you from getting hookworm.

2  
3 Every time that you get an injection, you will have to stay in the study clinic for at least two hours to  
4 make sure you do not start feeling bad. We will also examine you in the clinic 1, 3, 7, and 14 days  
5 after each injection. At these visits we will ask you how you are feeling and examine you. We will  
6 also take some of your blood (around 50 mL) on the days that you get the injections, and 14 and 28  
7 days after each injection.

8  
9 We will ask you to return to the clinic for follow-up 3, 6, 9 and 12 months following your final  
10 injection. At each follow-up visit we will take some of your blood (up to 50 mL). We will ask you to  
11 give us a stool sample to check for worm infections 1 month after the last injection, and at the end of  
12 the study. If you are infected with worms at the end of the study, we will give you medicine if you  
13 want it. There will be no charge for this medicine and we will give it to you for free. You can ask to  
14 one of the research medical doctors to explain to you the risks and benefits of these medicines.

15  
16 During this study, we will take blood from you 13 times, and the total amount of blood will be around  
17 550 ml. Your blood will be tested to check the function of your blood, your liver and your kidney,  
18 and to measure how your body responds to the vaccine. More blood tests might be needed if you get  
19 sick. Some of your blood will be stored at FIOCRUZ in Belo Horizonte initially for 5 years, and  
20 possibly for longer. This material may be used to do more tests on your blood if you become sick, or  
21 in future research using tests like those described in this document, or different tests. Storage for  
22 longer than 5 years or use of your blood in conducting other research will only be done after getting  
23 approval from the ethics committee at FIOCRUZ.

#### 24 25 **CAN I GET HURT IF I AM IN THIS STUDY?**

26 This is the first time that the new Na-GST-1 hookworm vaccine will be given to people. We do not  
27 know if the new hookworm vaccine will protect you from hookworm infection, and there is a chance  
28 that it will not work at all.

29  
30 When you get the new hookworm vaccine (with or without the additional immunostimulant) or the  
31 hepatitis B vaccine, you can expect some soreness and possibly some redness where the injection was  
32 given. You could also feel pain and itching and have purple or red spots on your skin. Some people  
33 feel a little sick for a few days after getting an injection. You could feel periods of hot and cold,  
34 headache, stomach ache, and sore muscles and joints. Some of this can happen several weeks after  
35 you receive the injection.

36  
37 With any vaccine, there is a very small chance that a serious and sometimes deadly allergic reaction  
38 might happen within the first hour after the injection is given. These feelings can start with your  
39 tongue swelling, feeling lightheaded or dizzy, or having a hard time breathing. Because of this you  
40 will be watched carefully for 2 hours after each injection. There may be other bad reactions that we  
41 don't know about yet. If we do find out about a new reaction to the hookworm vaccine or the  
42 hepatitis B vaccine, we will tell you. The research doctors and nurses will take good care of you if  
43 you have any problems with the injections. If you have a bad reaction to an injection you will not get  
44 any more injections.

45  
46 The new Na-GST-1 hookworm vaccine has never been tested in pregnant women and might be  
47 dangerous for the baby. If you are a woman, to be in this study you will have to use two methods of  
48 birth control, such as birth control pills and condoms, until 1 month after the last injection. We can  
49 help you pick the best methods, or we can send you to the health outpost to discuss the best birth  
50 control methods. We will give you the birth control that you want to use, for free.

51  
52 The blood tests may cause a little pain when the needle is put in the arm. Later the arm may have  
53 some bruising (purple spots) or bleeding where the needle went in, and rarely can get infected.  
54 Sometimes drawing blood causes people to feel lightheaded and even faint.

1 **WHAT IF I GET HURT WHILE IN THIS STUDY?**

2 If you get hurt or sick during the study, you should tell someone on the study team immediately, and  
3 we will give you medical care for free. The research doctors and nurses will make sure you get good  
4 treatment for any pain or injuries that are caused from taking part in this study. You will also receive  
5 comprehensive free care that is guaranteed by the sponsor of the study, in case of injury due to your  
6 participation, without any limitation or condition and the legal right to receive compensation.  
7

8 **ARE THERE ANY BENEFITS TO BEING IN THIS STUDY?**

9 You may not directly benefit from being in this study. However, during the study you may learn  
10 about worms and how to avoid them. Also, you will receive medical care during the study at the  
11 study clinic in Americaninhas. At the end of the study, we will tell you what vaccine you got. If you  
12 got the new hookworm vaccine, you can come to the clinic after the end of the study to get the  
13 hepatitis B vaccine if you want it. If you got the hepatitis B vaccine during the study, we will test  
14 some of your blood that we will collect at the end of the study to see if the vaccine worked and if you  
15 are protected against hepatitis B infection. If you are not protected, we will give you a second  
16 hepatitis B vaccine if you want it, at no cost to you. The hepatitis B vaccine will be given to you in  
17 three injections over a period of 6 months.  
18

19 **DO I GET ANYTHING FOR BEING IN THIS STUDY?**

20 You will not receive any money if you join this study. If you have to pay to come to the clinic for the  
21 study visits, we will pay for this transportation. Also, we will give you a meal at the clinic on the  
22 days that you get your injections.  
23

24 **DO I HAVE ANY OTHER OPTIONS BESIDES BEING IN THIS STUDY?**

25 You do not have to be in this study, and no one will be mad at you if you decide you do not want to  
26 do it. Medical care and health exams are available at the health post in your community. If you  
27 decide not to be in this study it will not affect your current or future medical care at the health post or  
28 at any other place.  
29

30 **WHAT ARE SOME OF THE REASONS I MIGHT NOT BE ABLE TO FINISH THE STUDY?**

31 The research doctors may decide that it is not good for you to stay in the study because it might be  
32 dangerous to your health. Also, the study team might stop the whole study from finishing.  
33

34 **HOW WILL MY INFORMATION BE KEPT PRIVATE?**

35 Information about you in this study will be kept in a secure place. People who need to make sure that  
36 the research is done well may look at your records. This might include the study staff, the sponsor of  
37 the study (the Sabin Vaccine Institute) or people they designate, the ethics committees of FIOCRUZ  
38 in Belo Horizonte, the Brazilian federal government, The George Washington University, and the  
39 Food and Drug Administration of the United States federal government. All of these people will keep  
40 your information private. We will not give any information that identifies you to anyone who is not  
41 working on the study.  
42

43 **WHO CAN I TALK TO IF I HAVE QUESTIONS?**

44 *For questions about your rights as a volunteer in research:*

45 **Research Ethics Committee: Dr. João Carlos Pinto Dias**

46 Fundação Oswaldo Cruz (FIOCRUZ), Centro de Pesquisas René Rachou

47 Avenida Augusto de Lima 1715, Barro Preto, Belo Horizonte, Tel: (31) 3292-7825  
48

49 *For questions about the study:*

50 **Principal Investigator: Dr. David Diemert**

51 Fundação Oswaldo Cruz (FIOCRUZ) - Centro de Pesquisas René Rachou

52 Avenida Augusto de Lima 1715, Barro Preto, Belo Horizonte, MG, Brasil – Tel: (31) 3349-7715  
53

54 *For questions about the study or if you want to report an illness:*

55 **Field Manager: Renata Caldeira Diniz**

56 Fundação Oswaldo Cruz (FIOCRUZ) - Centro de Pesquisas René Rachou

1 Avenida Augusto de Lima 1715, Barro Preto, Belo Horizonte, MG, Brasil – Tel: (31) 3349-7715 or  
2 (33) 3532-7014 (available 24 hours)

3 I have read, discussed, and understood this informed consent form. My questions were answered. I  
4 freely consent to participate in this study.

5  
6  
7  
8  
9 .....  
10 *Volunteer's Name (printed letters)*

11  
12  
13  
14 .....  
15 *Volunteer's Signature/Thumbprint*

16  
17  
18 Date: |\_|\_|/|\_|\_|/|\_|\_|\_|\_|  
19

20  
21 **Person Obtaining Consent:**

22  
23  
24 .....  
25 *Name (stamp or printed letters)*

26  
27  
28  
29 .....  
30 *Signature*

31  
32 Date: |\_|\_|/|\_|\_|/|\_|\_|\_|\_|  
33

34  
35 Can the volunteer read?       Yes     No (*requires presence and signature of a witness*)  
36

37 **Witness (if volunteer is not able to read and understand the Informed Consent Form):**

38 I affirm that the Informed Consent Form has been read to the volunteer and he/she understands the  
39 study and I have witnessed the volunteer's consent to participate in the study.

40  
41  
42 .....  
43 *Name (printed letters)*

44 .....  
45 *Signature*

46  
47  
48 Date: |\_|\_|/|\_|\_|/|\_|\_|\_|\_|  
49

50  
51  
52 **Principal Investigator or Designee:** Name: .....  
53 (*stamp or printed letters*)

54  
55  
56  
57  
58  
59  
60  
61  
62  
63  
64  
65  
66  
67  
68  
69  
70  
71  
72  
73  
74  
75  
76  
77  
78  
79  
80  
81  
82  
83  
84  
85  
86  
87  
88  
89  
90  
91  
92  
93  
94  
95  
96  
97  
98  
99  
100  
Signature: .....

101  
102  
103  
104  
105  
106  
107  
108  
109  
110  
111  
112  
113  
114  
115  
116  
117  
118  
119  
120  
121  
122  
123  
124  
125  
126  
127  
128  
129  
130  
131  
132  
133  
134  
135  
136  
137  
138  
139  
140  
141  
142  
143  
144  
145  
146  
147  
148  
149  
150  
151  
152  
153  
154  
155  
156  
157  
158  
159  
160  
161  
162  
163  
164  
165  
166  
167  
168  
169  
170  
171  
172  
173  
174  
175  
176  
177  
178  
179  
180  
181  
182  
183  
184  
185  
186  
187  
188  
189  
190  
191  
192  
193  
194  
195  
196  
197  
198  
199  
200  
Date: |\_|\_|/|\_|\_|/|\_|\_|\_|\_|
